# See and Hear What the Field Is Discussing!

*Psychiatric Services* features research related to the delivery of mental health services, especially for people with serious mental illness in community-based treatment programs. Provision of high-quality care involves collaboration among a variety of professionals. Clinicians, administrators, and policy makers look to *Psychiatric Services* for research on how to deliver evidence-based treatments, to take an integrated “whole-health” approach to care, and to better engage individuals in their care. Mental health’s current focus on patient-centered, recovery-oriented care and on dissemination of evidence-based practices is transforming service delivery systems at all levels. Research published in *Psychiatric Services* contributes to this transformation.

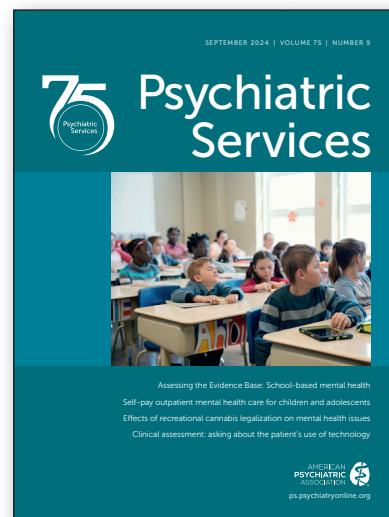

## Our Most Talked About Articles this year:

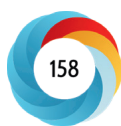

### Attention-Deficit Hyperactivity Disorder Stimulant Therapy and Prescription Drug Misuse During Transition to Young Adulthood

July 2024 issue

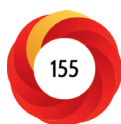

### Characterizing Schizophrenia Spectrum Disorders: Results of the U.S. Mental and Substance Use Disorders Prevalence Study

Published online September 23, 2024

## The Discussion Continues: *Psychiatric Services*' Podcast “From Pages to Practice”

Editor Lisa Dixon, M.D., M.P.H., and Podcast Editor and co-host Josh Berezin, M.D., M.S., discuss the latest mental health services research published in *Psychiatric Services* and why it is relevant. Topics include community-based treatment programs, collaborative care, evidence-based treatment and service delivery, criminal and social justice, policy analysis, and more. Recent episodes:

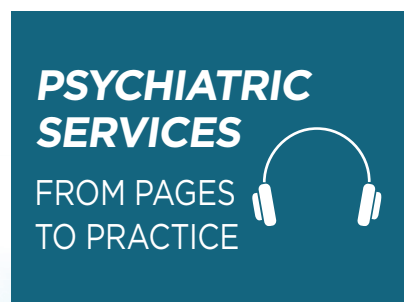

### Gender-Affirming Psychotherapy (GAP): Core Principles and Skills to Reduce the Mental Health Care “GAP” for Transgender Youths

Maggi A. Price, Ph.D., M.A., discusses a comprehensive, evidence-informed, and human-centered set of practices focusing on the treatment of transgender youth.

### Investing in School Mental Health: Strategies to Wisely Spend Federal and State Funding

Sharon A. Hoover, Ph.D., discusses the provision of mental health services in schools: why it matters, who it touches, how it's funded, and how it's doing.

A breakthrough over 3 decades in the making

# A NEW CLASS FOR THE TREATMENT OF SCHIZOPHRENIA IS HERE

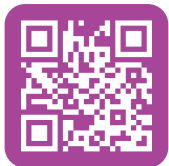

For more information,  
go to [treatscz.com](https://treatscz.com)
